# Supplementary material for: Integrated analysis of DNA-methylation and gene expression using high-dimensional penalized regression: a cohort study on bone mineral density in postmenopausal women
Source: BMC Med Genomics. 2018 Mar 7;11:24. doi: 10.1186/s12920-018-0341-2 (PMC5842543; doi:10.1186/s12920-018-0341-2)
Supplement: Supplementary file 6 — Table S2. The 22 identified CpGs selected by our weighted Lasso with data integration, together with information about their function and relation to bone. The functions are found using the web-site www.genecards.org, unless referred to by citation. No mark means no relevant information. (XLSX 34 kb) [file 12920_2018_341_MOESM6_ESM.xlsx]

## Sheet: Sheet1
Gene symbol	Name	Function	Relation to bone
NBEAL1	Neurobeachin-like1
ZNF529	Zinc finger protein 529	Transcription factor
NFIA	Nuclear factor I/A	Transcription factor
DYSF	Dysferlin	Calcium ion sensor
ADAMTS2	A disintegrin and metalloproteinase with thrombospondin motifs 22	Proteinase	The enzyme encoded by this gene excises the N-propeptide of type I, type II and type V procollagens. Mutations cause Ehlers-Danlos syndrome type VIIC, a recessively inherited connective-tissue disorder.
FCHO2	FCH domain only 2	Clathrin-mediated endocytosis
COL11A2	Collagen, type XI, alpha 2	Structural constituent	Extracellular matrix structural constituent of bone
HLA-DRB1	Major histocompatibility complex, class II, DR beta 1	Antigen presentation
TFEC	Transcription factor EC	Transcription factor	May co-regulate target genes in osteoclasts as a heterodimer with microphthalmia-associated transcription factor
DOCK5	Dedicator of cytokinesis 5	GTPase activation	Necessary for formation of the Osteoclast sealing zone (promoting bone resorption) [1]
MSRA	Methionine sulfoxide reductase A	Repair of oxidative damage
SPI1	Spleen focus forming virus (SFFV) proviral integration oncogene	Transcription factor
ALDH3B1	Aldehyde dehydrogenase 3 family, member B1	Protection from oxidative stress	Associated to bone metabolic pathways (unpublished).
BIN2	Bridging integrator 2	Plays a role in podosome formation. Inhibits phagocytosis
PTPN11	Protein tyrosine phosphatase, non-receptor type 11	Phosphatase	Regulator of bone and skeletal development [2]
PCDH9	Protocadherin 9	Cell adhesion
DIAPH3	Diaphanous-related formin 3	Actin remodeling, cell movement and adhesion
ANXA2	Annexin A2	Autocrine factor	Regulates osteoblast proliferation and bone repair [3]
MCTP2	Multiple C2 domains, transmembrane 2
ACSF3	Acyl-CoA synthetase family member 3	Catalyzes the initial reaction in intramitochondrial fatty acid synthesis
DSTN	Destrin (actin depolymerizing factor)	Actin depolymerizing	Necessary for maintainging BMD at reduced load [4]
MKL1	Megakaryoblastic leukemia (translocation) 1	Transcriptional coactivator
1. Vives, Virginie, et al.: Pharmacological inhibition of Dock5 prevents osteolysis by affecting osteoclast podosome organization while preserving bone formation. Nature communications 6 (2015): 6218.
2. Kamiya, N., Kim, H.K., King, P.D.: Regulation of bone and skeletal development by the shp-2 protein tyrosine phosphatase. Bone 69, 55-60 (2014)
3. Kawao, N., Tamura, Y., Okumoto, K., Yano, M., Okada, K., Matsuo, O., Kaji, H.: Tissue-type plasminogen activator deciency delays bone repair: roles of osteoblastic proliferation and vascular endothelial
growth factor. American Journal of Physiology-Endocrinology and Metabolism 307(3), 278-288 (2014).
4. Shuang, F., Sun, Y., Yang, H.-H., Shao, Y.-C., Li, H., Hu, W., Zhong, J., Zou, H.-X.: Destrin deletion enhances the bone loss in hindlimb suspended mice. European journal of applied physiology 113(2),
403-410 (2013)
